# Supplementary material for: A New Look into the Impacts of Dust Radiative Forcing on the Energetics of Tropical Easterly Waves
Source: Copernicus journal article supplement (doi:10.5194/egusphere-2022-1210), 2023-01-31
Supplement: Supplementary file 1 [file egusphere-2022-1210-supplement.pdf]

## Supplementary

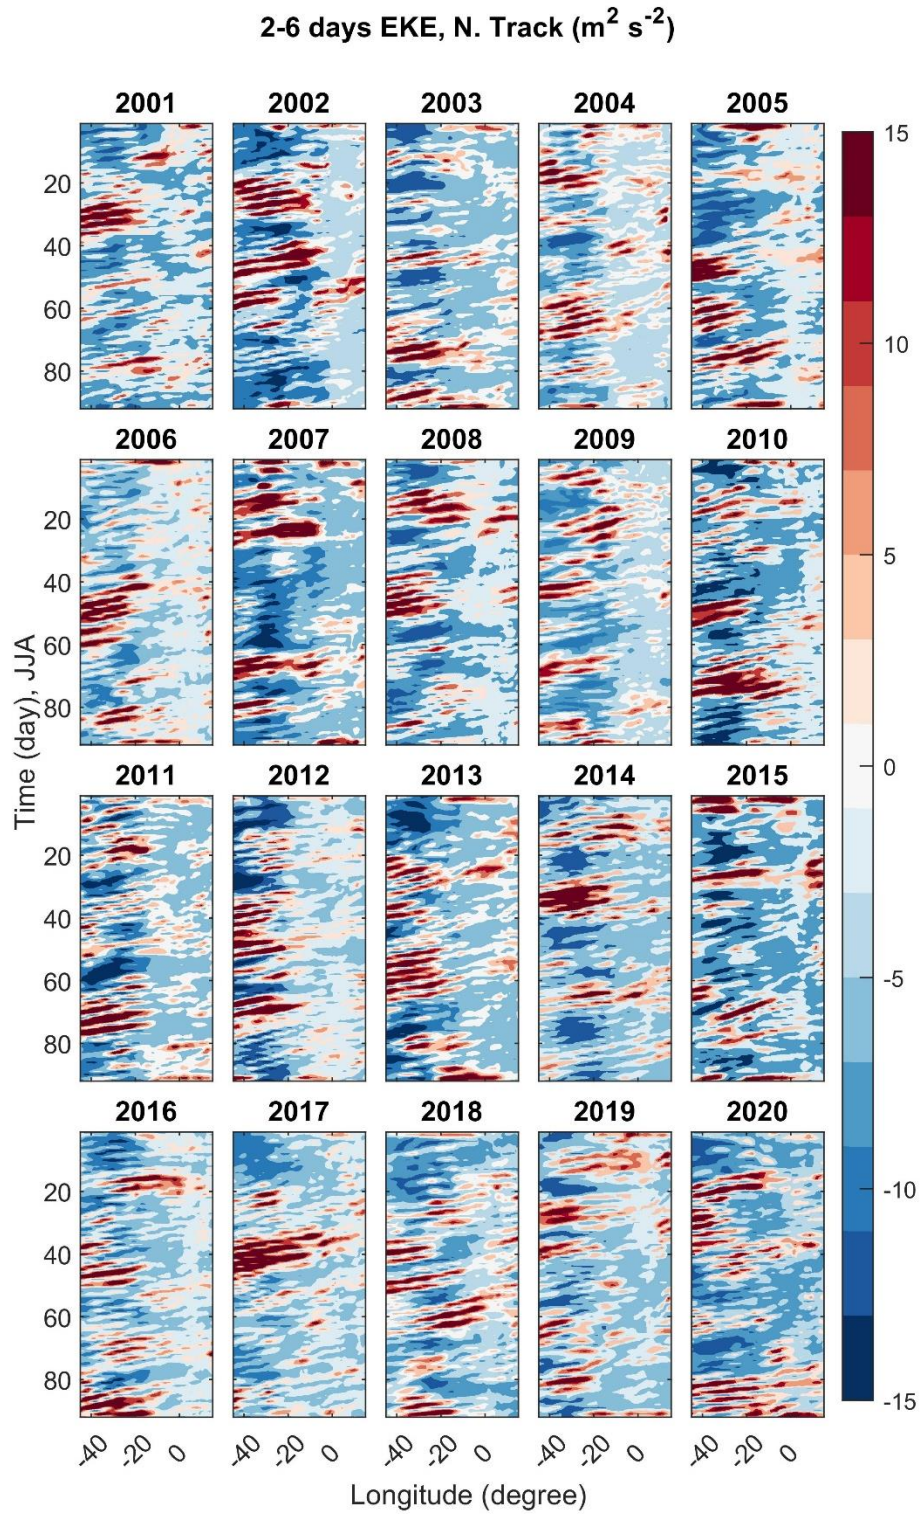

**Figure S1** Same as Figure 3 but for the northern track EKE, meridionally averaged over  $18^\circ$  to  $24^\circ\text{N}$ .

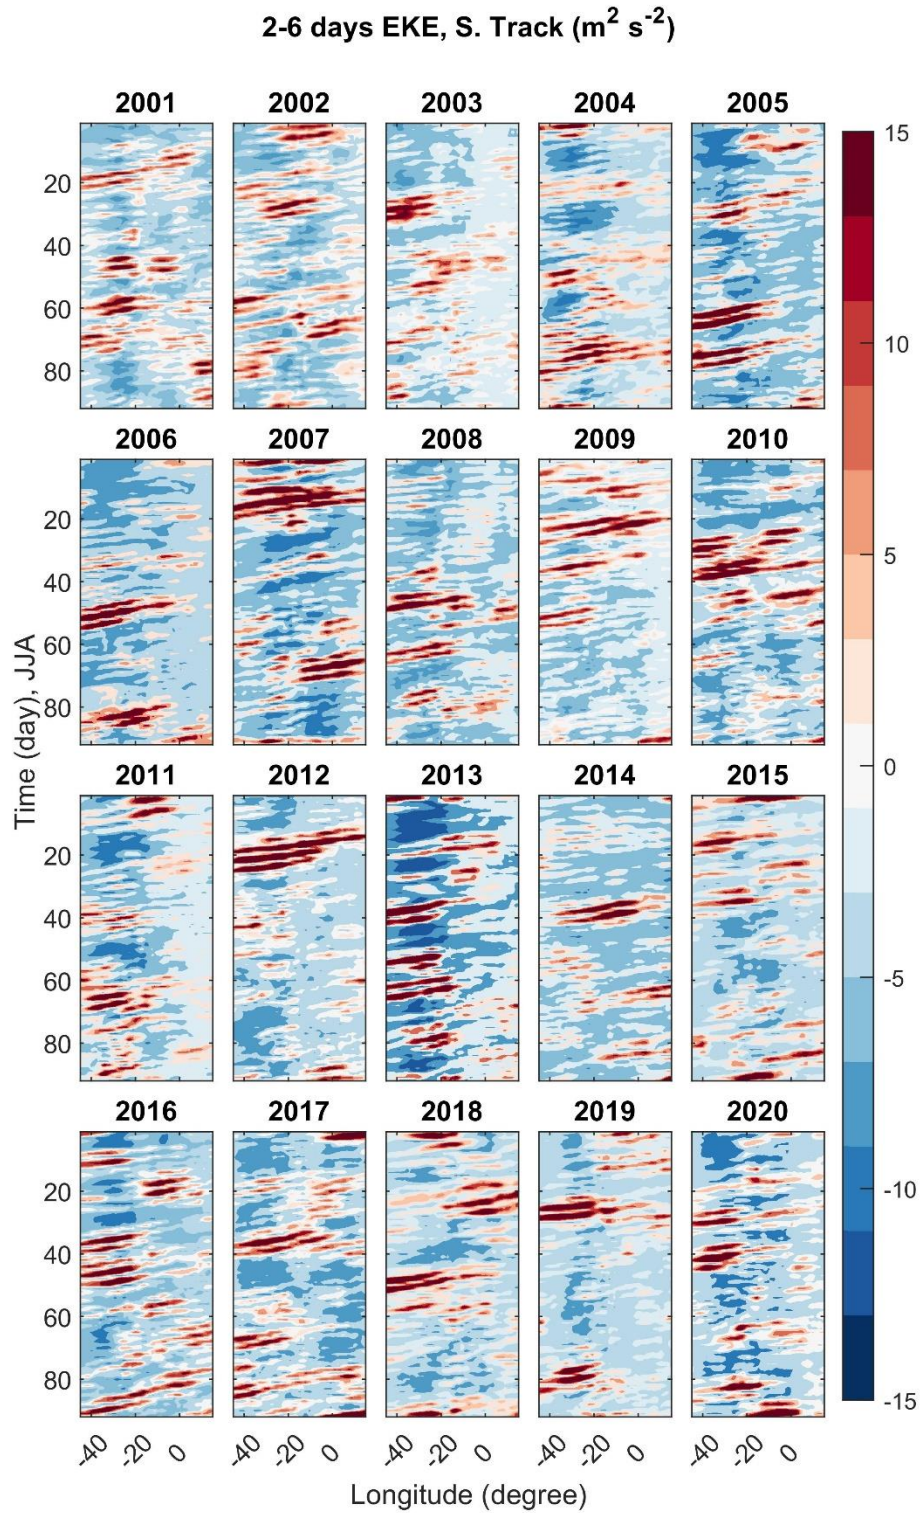

**Figure S2** Same as Figure 3 but for the southern track EKE, meridionally averaged over  $6^\circ$  to  $12^\circ\text{N}$ .



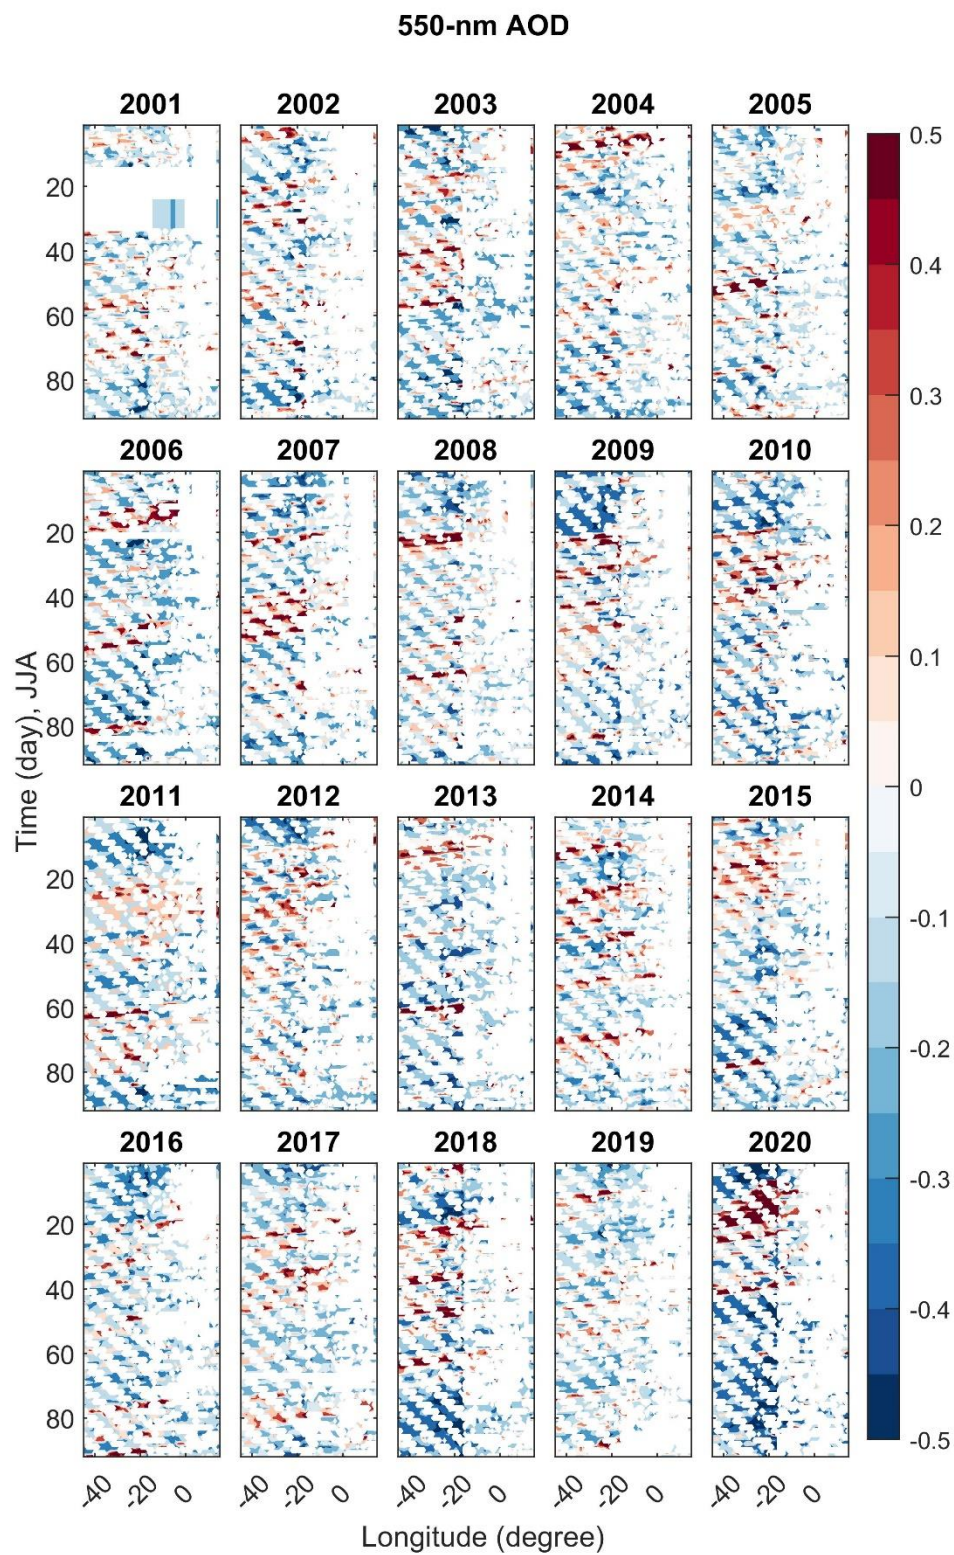

**Figure S3** Same as Figure 3 but for MODIS AOD.

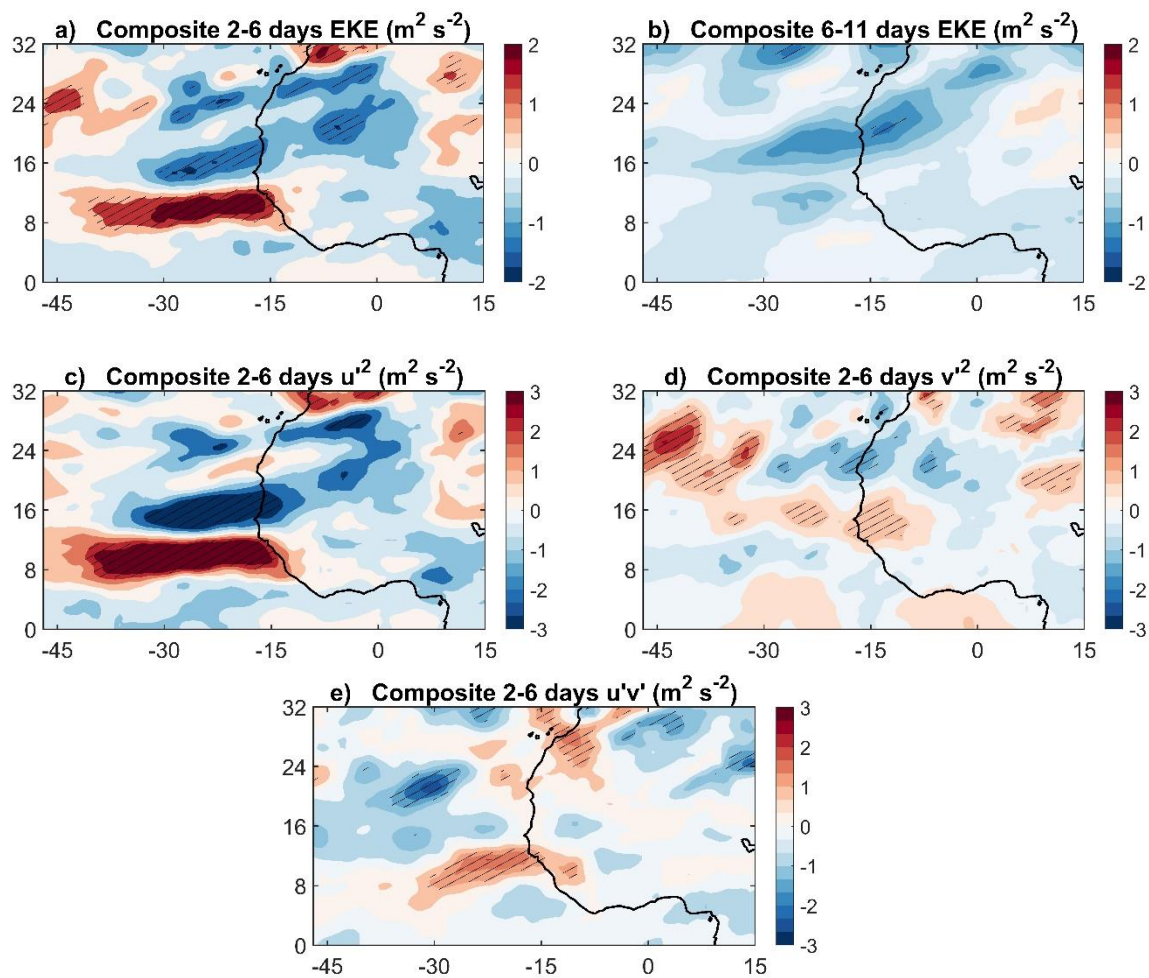

**Figure S4** Same as Figure 4 but MODIS AOD is used over the OSAL domain.

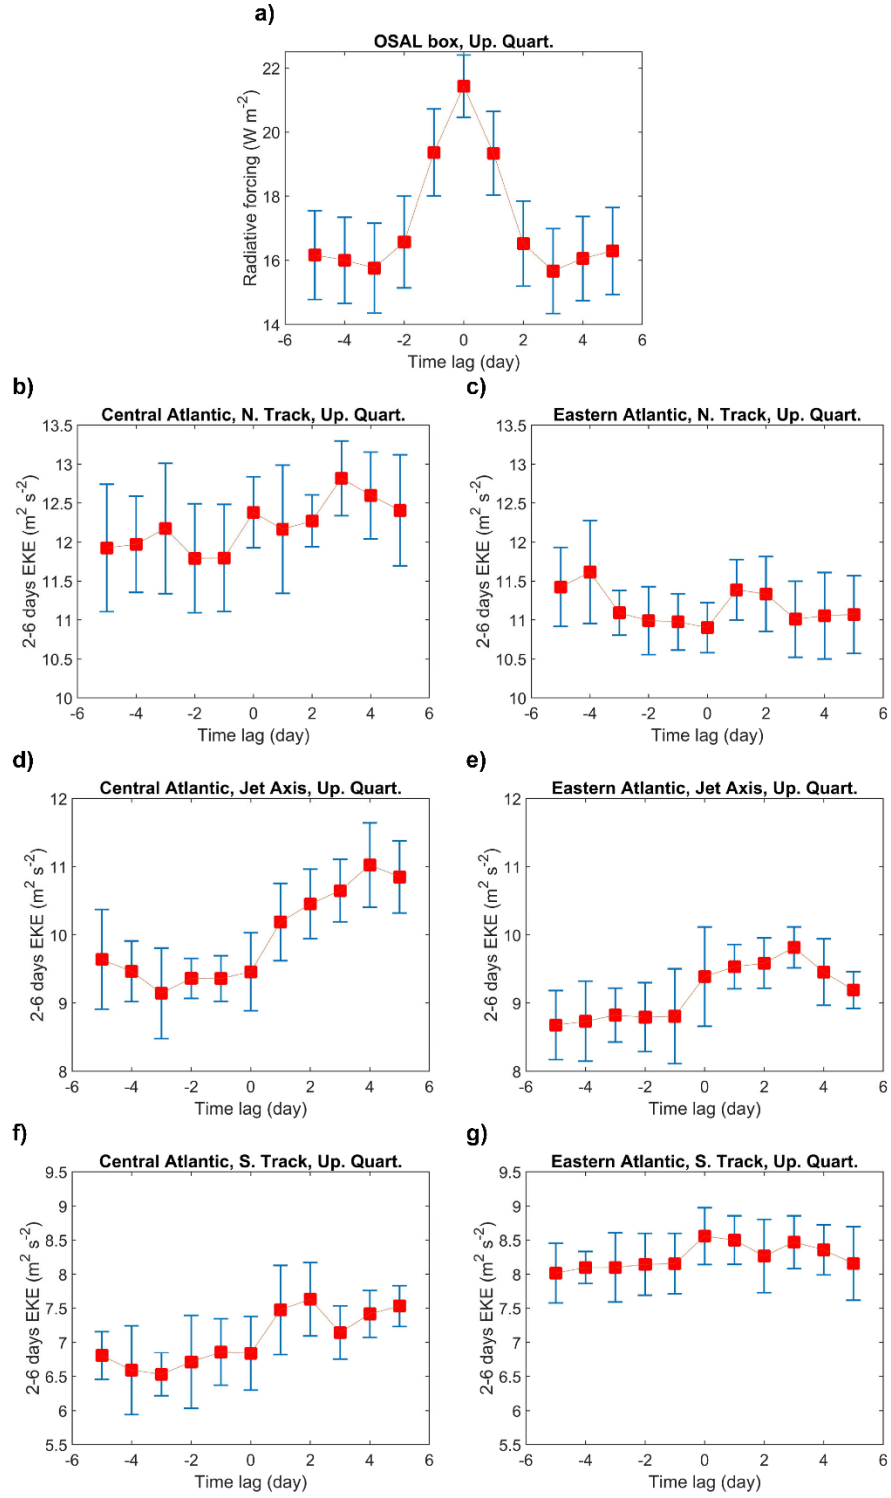

**Figure S5** Same as Figure 5, but for the time series of the upper quartile aerosol radiative forcing.

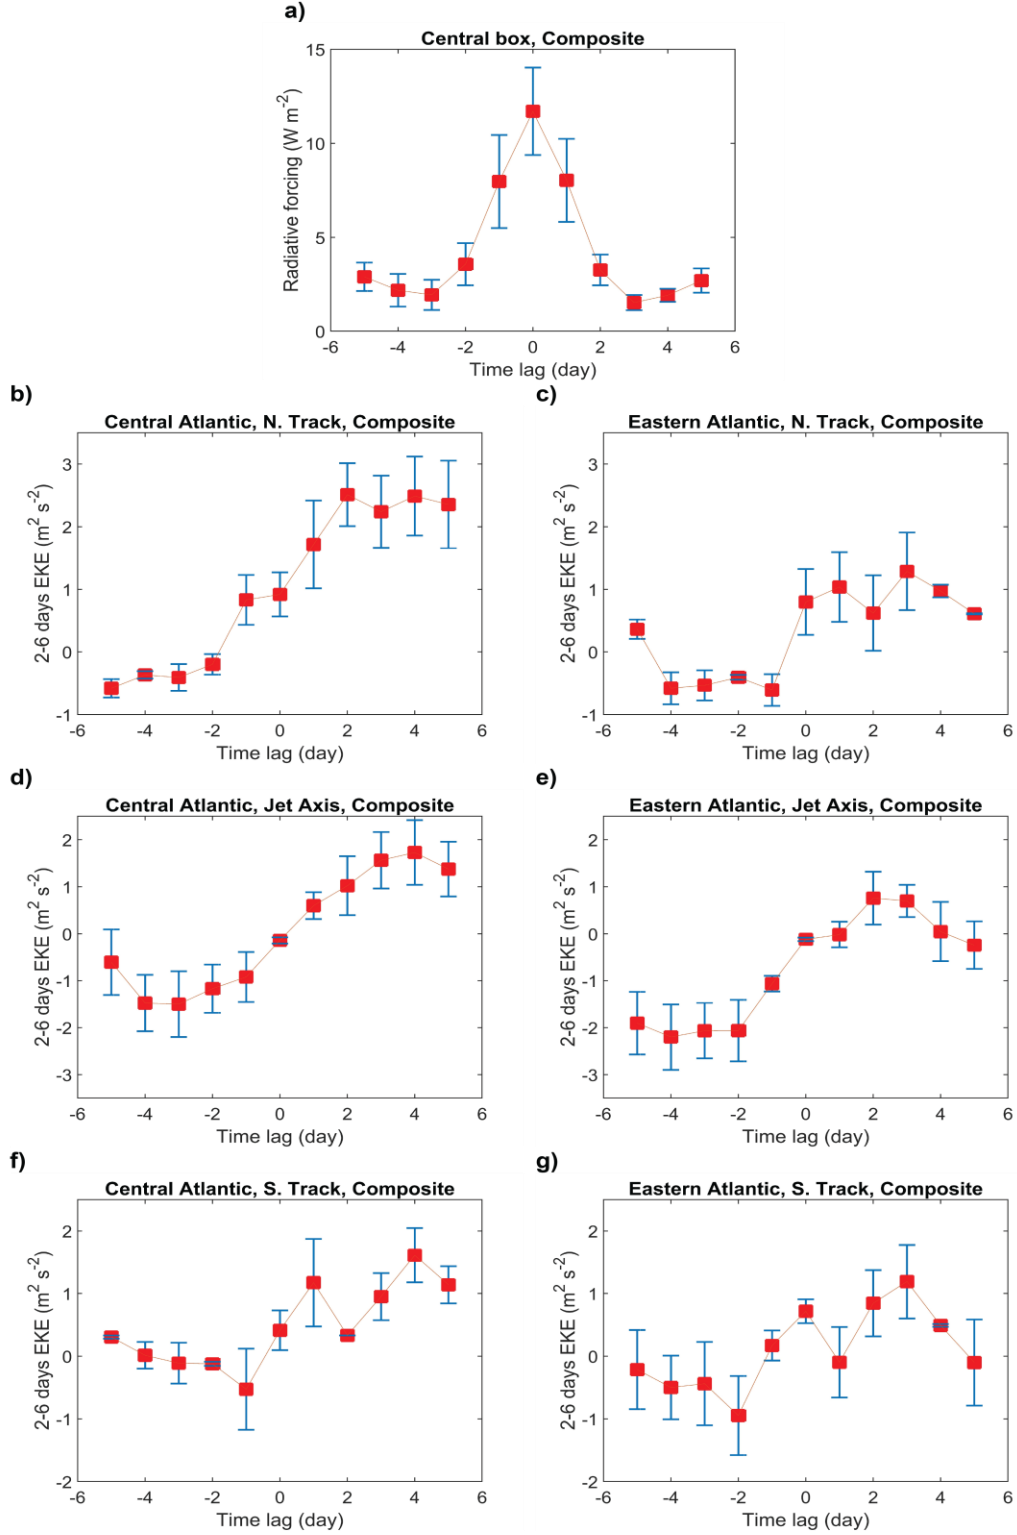

**Figure S6** Same as Figure 5, but the dust domain in SAL is selected further downstream over  $12^\circ$  to  $22^\circ\text{N}$  and  $-38^\circ$  to  $-28^\circ\text{E}$ .
